# Supplementary material for: Association of Maternal and Paternal Astigmatism With Child Astigmatism in the Hong Kong Children Eye Study
Source: PubMed Central journal article supplement (PMC9856878; doi:10.1001/jamanetworkopen.2022.47795), 2022-12-21
Supplement: jamanetwopen-e2247795-s001.pdf [file jamanetwopen-e2247795-s001.pdf]

## Supplemental Online Content

Kam KW, Chee ASH, Zhang Y, et al. Association of maternal and paternal astigmatism with child astigmatism in the Hong Kong Children Eye Study. *JAMA Netw Open*. 2022;5(12):e2247795.  
doi:10.1001/jamanetworkopen.2022.47795

**eTable 1.** Comparison of Astigmatism in Right Eye and Left Eye

**eTable 2.** Table of Contingencies for Left and Right Eyes

**eTable 3.** The Association of Parental Astigmatism on Child Astigmatism in 5708 Trios Using Different Cutoff Points for Astigmatism

**eTable 4.** The Association of Parental Astigmatism on Child Astigmatism in 5708 Trios Using Data from Different Eyes

**eTable 5.** Age and Sex Association Analysis on Child Astigmatism in 5708 Trios

**eFigure.** Different Combinations of Parental Astigmatism Severities on Child Astigmatism

**eAppendix.** Hong Kong Children Eye Study Questionnaire

This supplemental material has been provided by the authors to give readers additional information about their work.

**eTable 1. Comparison of Astigmatism in Right Eye and Left Eye**

|                                    | Right eye    | Left eye     |
|------------------------------------|--------------|--------------|
| Child's refractive astigmatism, D  | -0.72 (0.68) | -0.77 (0.70) |
| Child's corneal astigmatism, D     | 1.25 (0.66)  | 1.29 (0.69)  |
| Child's refractive astigmatism     |              |              |
| No                                 | 4319 (75.8%) | 4102 (72.6%) |
| Yes                                | 1379 (24.2%) | 1550 (27.4%) |
| Child's corneal astigmatism        |              |              |
| No                                 | 2179 (39.4%) | 2045 (37.0%) |
| Yes                                | 3345 (60.6%) | 3484 (63.0%) |
|                                    |              |              |
| Maternal refractive astigmatism, D | -0.79 (0.69) | -0.82 (0.75) |
| Maternal corneal astigmatism, D    | 1.07 (0.69)  | 1.12 (0.72)  |
| Maternal refractive astigmatism    |              |              |
| No                                 | 4031 (70.8%) | 3907 (68.8%) |
| Mild                               | 1259 (22.1%) | 1273 (22.4%) |
| High                               | 407 (7.1%)   | 501 (8.8%)   |
| Maternal corneal astigmatism       |              |              |
| No                                 | 3050 (54.5%) | 2879 (51.7%) |
| Mild                               | 2019 (36.1%) | 2059 (37.0%) |
| High                               | 525 (9.4%)   | 632 (11.3%)  |
|                                    |              |              |
| Paternal refractive astigmatism, D | -0.91 (0.78) | -0.91 (0.80) |
| Paternal corneal astigmatism, D    | 1.03 (0.73)  | 1.05 (0.74)  |
| Paternal refractive astigmatism    |              |              |
| No                                 | 3594 (63.0%) | 3558 (62.7%) |
| Mild                               | 1558 (27.3%) | 1501 (26.5%) |
| High                               | 662 (9.7%)   | 613 (10.8%)  |
| Paternal corneal astigmatism       |              |              |
| No                                 | 3283 (58.8%) | 3170 (57.0%) |
| Mild                               | 1771 (31.7%) | 1842 (33.1%) |
| High                               | 532 (9.5%)   | 552 (9.9%)   |

**eTable 2. Table of Contingencies for Left and Right Eyes**

| <b>Child's Refractive Astigmatism</b>  |      |          |      |      |
|----------------------------------------|------|----------|------|------|
|                                        |      | Left eye |      |      |
|                                        |      | No       | Yes  |      |
| Right eye                              | No   | 3782     | 473  |      |
|                                        | Yes  | 292      | 1076 |      |
| <b>Child's Corneal Astigmatism</b>     |      |          |      |      |
|                                        |      | Left eye |      |      |
|                                        |      | No       | Yes  |      |
| Right eye                              | No   | 1534     | 627  |      |
|                                        | Yes  | 476      | 2828 |      |
| <b>Maternal Refractive Astigmatism</b> |      |          |      |      |
|                                        |      | Left eye |      |      |
|                                        |      | No       | Mild | High |
| Right eye                              | No   | 3448     | 509  | 60   |
|                                        | Mild | 438      | 658  | 162  |
|                                        | High | 21       | 106  | 279  |
| <b>Maternal Corneal Astigmatism</b>    |      |          |      |      |
|                                        |      | Left eye |      |      |
|                                        |      | No       | Mild | High |
| Right eye                              | No   | 2322     | 647  | 42   |
|                                        | Mild | 511      | 1254 | 242  |
|                                        | High | 21       | 154  | 343  |
| <b>Paternal Refractive Astigmatism</b> |      |          |      |      |
|                                        |      | Left eye |      |      |
|                                        |      | No       | Mild | High |
| Right eye                              | No   | 2903     | 592  | 73   |
|                                        | Mild | 606      | 747  | 201  |
|                                        | High | 49       | 162  | 339  |
| <b>Paternal Corneal Astigmatism</b>    |      |          |      |      |
|                                        |      | Left eye |      |      |
|                                        |      | No       | Mild | High |
| Right eye                              | No   | 2562     | 626  | 43   |
|                                        | Mild | 537      | 1046 | 168  |
|                                        | High | 30       | 159  | 338  |

**eTable 3. The Association of Parental Astigmatism on Child Astigmatism in 5708 Trios Using Different Cutoff Points for Astigmatism**

| <b>Child refractive astigmatism was defined as astigmatism of <math>\leq -0.75D</math></b> |                                     |                | <b>Child corneal astigmatism was defined as astigmatism of <math>\geq 0.75D</math></b> |                                  |                |
|--------------------------------------------------------------------------------------------|-------------------------------------|----------------|----------------------------------------------------------------------------------------|----------------------------------|----------------|
|                                                                                            | <b>Child Refractive Astigmatism</b> |                |                                                                                        | <b>Child Corneal Astigmatism</b> |                |
|                                                                                            | OR <sup>a</sup> (95% CI)            | <i>P</i> Value |                                                                                        | OR <sup>a</sup> (95% CI)         | <i>P</i> Value |
| Maternal refractive astigmatism, D                                                         | 0.85 (0.76-0.93)                    | 0.001          | Maternal corneal astigmatism, D                                                        | 1.61 (1.38-1.87)                 | <0.001         |
| Paternal refractive astigmatism, D                                                         | 0.84 (0.77-0.92)                    | <0.001         | Paternal corneal astigmatism, D                                                        | 1.39 (1.21-1.60)                 | <0.001         |
| Child's age, years                                                                         | 0.94 (0.86-1.03)                    | 0.16           | Child's age, years                                                                     | 0.94 (0.84-1.05)                 | 0.27           |
| Sex, male as reference                                                                     | 0.87 (0.75-1.00)                    | 0.05           | Sex, male as reference                                                                 | 1.03 (0.86-1.25)                 | 0.75           |
| Child's spherical equivalent, D                                                            | 0.92 (0.88-0.97)                    | 0.001          | Child's axial length, mm                                                               | 0.81 (0.72-0.89)                 | <0.001         |
| Outdoor time, hours per day                                                                | 0.98 (0.85-1.13)                    | 0.78           | Outdoor time, hours per day                                                            | 0.88 (0.75-1.05)                 | 0.16           |
| Near work, diopter hours per day                                                           | 1.00 (0.97-1.03)                    | 0.92           | Near work, diopter hours per day                                                       | 1.03 (0.99-1.06)                 | 0.18           |
| Family income per month, <HK \$20000 as reference                                          | 1.04 (0.86-1.25)                    | 0.71           | Family income per month, <HK \$20000 as reference                                      | 1.03 (0.81-1.30)                 | 0.83           |
| Mother education level, without post-secondary as reference                                | 1.02 (0.85-1.21)                    | 0.85           | Mother education level, without post-secondary as reference                            | 1.09 (0.87-1.35)                 | 0.46           |
| Father education level, without post-secondary as reference                                | 0.86 (0.72-1.03)                    | 0.10           | Father education level, without post-secondary as reference                            | 0.91 (0.73-1.13)                 | 0.40           |
| <b>Child refractive astigmatism was defined as astigmatism of <math>\leq -1.25D</math></b> |                                     |                | <b>Child corneal astigmatism was defined as astigmatism of <math>\geq 1.25D</math></b> |                                  |                |
|                                                                                            | <b>Child Refractive Astigmatism</b> |                |                                                                                        | <b>Child Corneal Astigmatism</b> |                |
|                                                                                            | OR <sup>a</sup> (95% CI)            | <i>P</i> Value |                                                                                        | OR <sup>a</sup> (95% CI)         | <i>P</i> Value |
| Maternal refractive astigmatism, D                                                         | 0.72 (0.64-0.80)                    | <0.001         | Maternal corneal astigmatism, D                                                        | 1.71 (1.53-1.92)                 | <0.001         |

|                                                             |                  |        |                                                             |                  |        |
|-------------------------------------------------------------|------------------|--------|-------------------------------------------------------------|------------------|--------|
| Paternal refractive astigmatism, D                          | 0.83 (0.74-0.93) | 0.001  | Paternal corneal astigmatism, D                             | 1.42 (1.28-1.58) | <0.001 |
| Child's age, years                                          | 0.87 (0.77-0.97) | 0.02   | Child's age, years                                          | 1.03 (0.94-1.14) | 0.48   |
| Sex, male as reference                                      | 0.94 (0.77-1.14) | 0.51   | Sex, male as reference                                      | 0.91 (0.78-1.07) | 0.26   |
| Child's spherical equivalent, D                             | 0.81 (0.77-0.87) | <0.001 | Child's axial length, mm                                    | 0.75 (0.69-0.83) | <0.001 |
| Outdoor time, hours per day                                 | 0.96 (0.80-1.16) | 0.69   | Outdoor time, hours per day                                 | 0.96 (0.83-1.11) | 0.58   |
| Near work, diopter hours per day                            | 1.00 (0.96-1.04) | 0.98   | Near work, diopter hours per day                            | 1.01 (0.98-1.04) | 0.38   |
| Family income per month, <HK \$20000 as reference           | 0.99 (0.77-1.27) | 0.92   | Family income per month, <HK \$20000 as reference           | 1.01 (0.83-1.23) | 0.93   |
| Mother education level, without post-secondary as reference | 0.99 (0.78-1.26) | 0.94   | Mother education level, without post-secondary as reference | 0.96 (0.80-1.16) | 0.67   |
| Father education level, without post-secondary as reference | 0.85 (0.67-1.08) | 0.19   | Father education level, without post-secondary as reference | 0.89 (0.74-1.07) | 0.20   |

Abbreviation: D, diopter; OR, odds ratio; CI, confidence interval.

<sup>a</sup>OR was estimated by multiple logistic regression model.

**eTable 4. The Association of Parental Astigmatism on Child Astigmatism in 5708 Trios Using Data from Different Eyes**

| <b>Using Data from <i>Left Eye</i></b>                      |                          |                |                                                             |                          |                |
|-------------------------------------------------------------|--------------------------|----------------|-------------------------------------------------------------|--------------------------|----------------|
| <b>Child Refractive Astigmatism<sup>c</sup></b>             |                          |                | <b>Child Corneal Astigmatism<sup>d</sup></b>                |                          |                |
|                                                             | OR <sup>a</sup> (95% CI) | <i>P</i> Value |                                                             | OR <sup>a</sup> (95% CI) | <i>P</i> Value |
| Maternal refractive astigmatism, D                          | 0.76 (0.69-0.85)         | <0.001         | Maternal corneal astigmatism, D                             | 1.41 (1.26-1.57)         | <0.001         |
| Paternal refractive astigmatism, D                          | 0.82 (0.74-0.90)         | <0.001         | Paternal corneal astigmatism, D                             | 1.32 (1.18-1.48)         | <0.001         |
| Child's age, years                                          | 0.96 (0.87-1.05)         | 0.36           | Child's age, years                                          | 1.09 (0.99-1.20)         | 0.08           |
| Sex, male as reference                                      | 0.96 (0.82-1.13)         | 0.62           | Sex, male as reference                                      | 0.89 (0.76-1.04)         | 0.15           |
| Child's spherical equivalent, D                             | 0.87 (0.83-0.92)         | <0.001         | Child's axial length, mm                                    | 0.77 (0.70-0.84)         | <0.001         |
| Outdoor time, hours per day                                 | 0.92 (0.79-1.08)         | 0.30           | Outdoor time, hours per day                                 | 0.89 (0.77-1.03)         | 0.11           |
| Near work, diopter hours per day                            | 1.00 (0.97-1.03)         | 0.95           | Near work, diopter hours per day                            | 1.02 (0.99-1.05)         | 0.33           |
| Family income per month, <HK \$20000 as reference           | 1.13 (0.92-1.40)         | 0.25           | Family income per month, <HK \$20000 as reference           | 1.01 (0.83-1.24)         | 0.91           |
| Mother education level, without post-secondary as reference | 1.11 (0.91-1.35)         | 0.31           | Mother education level, without post-secondary as reference | 1.00 (0.83-1.20)         | 0.95           |
| Father education level, without post-secondary as reference | 0.71 (0.58-0.87)         | 0.001          | Father education level, without post-secondary as reference | 0.94 (0.78-1.13)         | 0.52           |
| <b>Using Data from <i>Average of Both Eyes</i></b>          |                          |                |                                                             |                          |                |
| <b>Child Refractive Astigmatism, D<sup>c</sup></b>          |                          |                | <b>Child Corneal Astigmatism, D<sup>d</sup></b>             |                          |                |
|                                                             | OR <sup>a</sup> (95% CI) | <i>P</i> Value |                                                             | OR <sup>a</sup> (95% CI) | <i>P</i> Value |
| Maternal refractive astigmatism, D                          | 0.73 (0.65-0.82)         | <0.001         | Maternal corneal astigmatism, D                             | 1.72 (1.51-1.94)         | <0.001         |

|                                                             |                          |                |                                                             |                          |                |
|-------------------------------------------------------------|--------------------------|----------------|-------------------------------------------------------------|--------------------------|----------------|
| Paternal refractive astigmatism, D                          | 0.78 (0.70-0.87)         | <0.001         | Paternal corneal astigmatism, D                             | 1.39 (1.23-1.56)         | <0.001         |
| Child's age, years                                          | 0.92 (0.83-1.02)         | 0.10           | Child's age, years                                          | 1.04 (0.95-1.14)         | 0.40           |
| Sex, male as reference                                      | 0.93 (0.78-1.10)         | 0.40           | Sex, male as reference                                      | 0.86 (0.74-1.01)         | 0.07           |
| Child's spherical equivalent, D                             | 0.84 (0.79-0.89)         | <0.001         | Child's axial length, mm                                    | 0.75 (0.69-0.83)         | <0.001         |
| Outdoor time, hours per day                                 | 0.90 (0.76-1.07)         | 0.24           | Outdoor time, hours per day                                 | 0.84 (0.73-0.97)         | 0.02           |
| Near work, diopter hours per day                            | 1.00 (0.97-1.04)         | 0.93           | Near work, diopter hours per day                            | 1.02 (0.99-1.05)         | 0.30           |
| Family income per month, <HK \$20000 as reference           | 1.02 (0.81-1.27)         | 0.87           | Family income per month, <HK \$20000 as reference           | 1.02 (0.84-1.25)         | 0.81           |
| Mother education level, without post-secondary as reference | 0.96 (0.78-1.19)         | 0.73           | Mother education level, without post-secondary as reference | 0.98 (0.82-1.18)         | 0.83           |
| Father education level, without post-secondary as reference | 0.79 (0.64-0.98)         | 0.03           | Father education level, without post-secondary as reference | 0.88 (0.73-1.05)         | 0.16           |
| <b>Using Data from <i>Worse Eye</i></b>                     |                          |                |                                                             |                          |                |
| <b>Child Refractive Astigmatism, D<sup>c</sup></b>          |                          |                | <b>Child Corneal Astigmatism, D<sup>d</sup></b>             |                          |                |
|                                                             | OR <sup>a</sup> (95% CI) | <i>P</i> Value |                                                             | OR <sup>a</sup> (95% CI) | <i>P</i> Value |
| Maternal refractive astigmatism, D                          | 0.81 (0.74-0.89)         | <0.001         | Maternal corneal astigmatism, D                             | 1.58 (1.40-1.79)         | <0.001         |
| Paternal refractive astigmatism, D                          | 0.85 (0.78-0.92)         | <0.001         | Paternal corneal astigmatism, D                             | 1.34 (1.20-1.51)         | <0.001         |
| Child's age, years                                          | 0.91 (0.83-0.99)         | 0.03           | Child's age, years                                          | 1.10 (1.00-1.22)         | 0.06           |
| Sex, male as reference                                      | 0.89 (0.76-1.03)         | 0.12           | Sex, male as reference                                      | 0.92 (0.78-1.09)         | 0.36           |
| Child's spherical equivalent, D                             | 0.83 (0.79-0.88)         | <0.001         | Child's axial length, mm                                    | 0.78 (0.71-0.86)         | <0.001         |
| Outdoor time, hours per day                                 | 0.92 (0.80-1.07)         | 0.29           | Outdoor time, hours per day                                 | 0.91 (0.78-1.06)         | 0.25           |
| Near work, diopter hours per day                            | 1.00 (0.97-1.03)         | 0.86           | Near work, diopter hours per day                            | 1.03 (1.00-1.07)         | 0.05           |

|                                                             |                  |       |                                                             |                  |      |
|-------------------------------------------------------------|------------------|-------|-------------------------------------------------------------|------------------|------|
| Family income per month, <HK \$20000 as reference           | 1.05 (0.86-1.28) | 0.63  | Family income per month, <HK \$20000 as reference           | 1.05 (0.85-1.29) | 0.67 |
| Mother education level, without post-secondary as reference | 1.04 (0.86-1.25) | 0.72  | Mother education level, without post-secondary as reference | 1.04 (0.86-1.27) | 0.69 |
| Father education level, without post-secondary as reference | 0.76 (0.63-0.92) | 0.004 | Father education level, without post-secondary as reference | 0.86 (0.71-1.04) | 0.13 |

Abbreviation: D, diopter; OR, odds ratio; CI, confidence interval.

<sup>a</sup> OR was estimated by multiple logistic regression model.

<sup>b</sup> *P*-trend of parental influence was estimated by univariate analysis.

<sup>c</sup> Age, sex, child's spherical equivalent, outdoor time, near work, family income and parental education level were adjusted in refractive astigmatism model.

<sup>d</sup> Age, sex, child's axial length, outdoor time, near work, family income and parental education level were adjusted in corneal astigmatism model.



**eTable 5. Age and Sex Association Analysis on Child Astigmatism in 5708 Trios**

| <b>Age (years)</b>           | <b>Estimated mean RA<sup>a</sup> (D)</b> | <b>Estimated mean CA<sup>a</sup> (D)</b> |
|------------------------------|------------------------------------------|------------------------------------------|
| 6                            | -0.76 (-0.81 to -0.72)                   | 1.28 (1.24-1.33)                         |
| 7                            | -0.71 (-0.75 to -0.67)                   | 1.25 (1.21-1.29)                         |
| 8                            | -0.69 (-0.74 to -0.64)                   | 1.22 (1.17-1.27)                         |
| <i>P</i> -trend <sup>b</sup> | 0.04                                     | 0.13                                     |
| <b>Sex</b>                   |                                          |                                          |
| Male                         | -0.74 (-0.78 to -0.71)                   | 1.24 (1.21-1.28)                         |
| Female                       | -0.71 (-0.75 to -0.67)                   | 1.27 (1.23-1.31)                         |
| <i>P</i> Value <sup>c</sup>  | 0.18                                     | 0.34                                     |

<sup>a</sup> Estimated mean values were generated by univariate analyses.

<sup>b</sup> *P* trend was calculated with the adjustment of parental astigmatism, sex, child's spherical equivalent, outdoor time, near work, family income and parental education level.

<sup>c</sup> *P* values was calculated with the adjustment of parental astigmatism, age, child's axial length, outdoor time, near work, family income and parental education level.

**eFigure 1. Different Combinations of Parental Astigmatism Severities on Child Astigmatism**

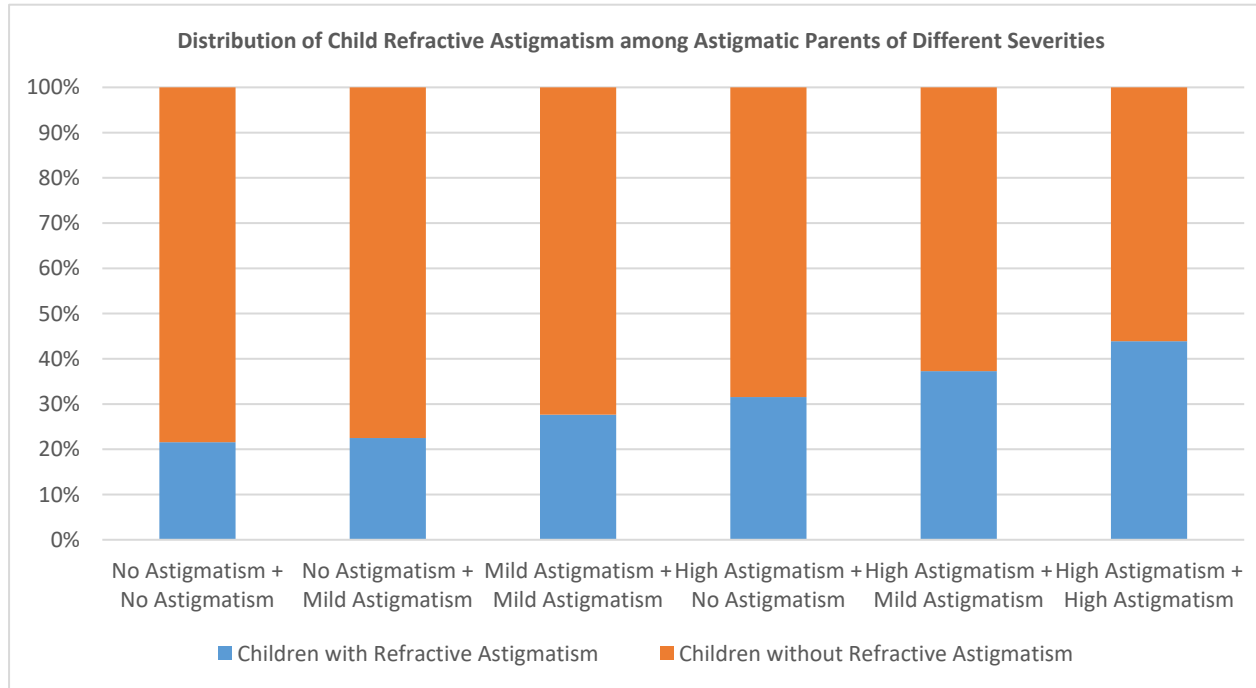

Distribution of Child Corneal Astigmatism among Astigmatic Parents of Different Severities

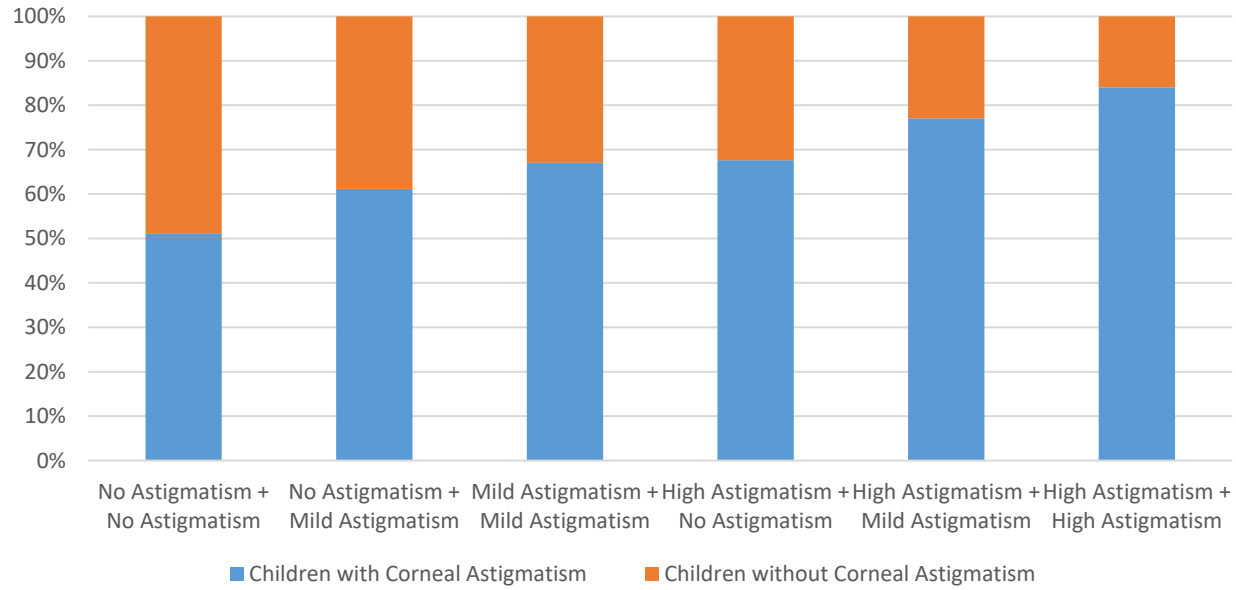

## eAppendix. Hong Kong Children Eye Study Questionnaire

Please tick the average number of **hours per day** that your child spends doing the following activities (*e.g. if your child does 15 hours of outdoor leisure activities per week, then the average number of hours per weekday is 3 hours*). If your child spends **more than 3 hours** on a particular activity, please specify **the amount of hours spent**.

|                                                                              | On a school weekday      |                          |                          |                                   | On a school weekend      |                          |                          |                                   | On a vacation day<br>(e.g. summer and winter break) |                          |                          |                                   |
|------------------------------------------------------------------------------|--------------------------|--------------------------|--------------------------|-----------------------------------|--------------------------|--------------------------|--------------------------|-----------------------------------|-----------------------------------------------------|--------------------------|--------------------------|-----------------------------------|
|                                                                              | Not at all               | Less than 1 hour         | 1-2 hours                | 3 or more hours                   | Not at all               | Less than 1 hour         | 1-2 hours                | 3 or more hours                   | Not at all                                          | Less than 1 hour         | 1-2 hours                | 3 or more hours                   |
| a) Out of door activities (in your backyard, walking, riding a bike/scooter) | <input type="checkbox"/> | <input type="checkbox"/> | <input type="checkbox"/> | <input type="checkbox"/><br>hours | <input type="checkbox"/> | <input type="checkbox"/> | <input type="checkbox"/> | <input type="checkbox"/><br>hours | <input type="checkbox"/>                            | <input type="checkbox"/> | <input type="checkbox"/> | <input type="checkbox"/><br>hours |
| b) Outdoor leisure activities ( <i>e.g. BBQs, picnic, beach, bushwalk</i> )  | <input type="checkbox"/> | <input type="checkbox"/> | <input type="checkbox"/> | <input type="checkbox"/><br>hours | <input type="checkbox"/> | <input type="checkbox"/> | <input type="checkbox"/> | <input type="checkbox"/><br>hours | <input type="checkbox"/>                            | <input type="checkbox"/> | <input type="checkbox"/> | <input type="checkbox"/><br>hours |
| c) Indoor activities (gymnasium, dance studio,)                              | <input type="checkbox"/> | <input type="checkbox"/> | <input type="checkbox"/> | <input type="checkbox"/><br>hours | <input type="checkbox"/> | <input type="checkbox"/> | <input type="checkbox"/> | <input type="checkbox"/><br>hours | <input type="checkbox"/>                            | <input type="checkbox"/> | <input type="checkbox"/> | <input type="checkbox"/><br>hours |
| c) Watching T.V/ videos/ DVDs                                                | <input type="checkbox"/> | <input type="checkbox"/> | <input type="checkbox"/> | <input type="checkbox"/><br>hours | <input type="checkbox"/> | <input type="checkbox"/> | <input type="checkbox"/> | <input type="checkbox"/><br>hours | <input type="checkbox"/>                            | <input type="checkbox"/> | <input type="checkbox"/> | <input type="checkbox"/><br>hours |
| d) Playing home video game ( <i>e.g. PlayStation</i> )                       | <input type="checkbox"/> | <input type="checkbox"/> | <input type="checkbox"/> | <input type="checkbox"/><br>hours | <input type="checkbox"/> | <input type="checkbox"/> | <input type="checkbox"/> | <input type="checkbox"/><br>hours | <input type="checkbox"/>                            | <input type="checkbox"/> | <input type="checkbox"/> | <input type="checkbox"/><br>hours |
| e) Drawing, painting and/or writing                                          | <input type="checkbox"/> | <input type="checkbox"/> | <input type="checkbox"/> | <input type="checkbox"/><br>hours | <input type="checkbox"/> | <input type="checkbox"/> | <input type="checkbox"/> | <input type="checkbox"/><br>hours | <input type="checkbox"/>                            | <input type="checkbox"/> | <input type="checkbox"/> | <input type="checkbox"/><br>hours |
| f) Hobbies and crafts                                                        | <input type="checkbox"/> | <input type="checkbox"/> | <input type="checkbox"/> | <input type="checkbox"/><br>hours | <input type="checkbox"/> | <input type="checkbox"/> | <input type="checkbox"/> | <input type="checkbox"/><br>hours | <input type="checkbox"/>                            | <input type="checkbox"/> | <input type="checkbox"/> | <input type="checkbox"/><br>hours |
| g) Cooking, making or constructing things                                    | <input type="checkbox"/> | <input type="checkbox"/> | <input type="checkbox"/> | <input type="checkbox"/><br>hours | <input type="checkbox"/> | <input type="checkbox"/> | <input type="checkbox"/> | <input type="checkbox"/><br>hours | <input type="checkbox"/>                            | <input type="checkbox"/> | <input type="checkbox"/> | <input type="checkbox"/><br>hours |
| h) School homework                                                           | <input type="checkbox"/> | <input type="checkbox"/> | <input type="checkbox"/> | <input type="checkbox"/><br>hours | <input type="checkbox"/> | <input type="checkbox"/> | <input type="checkbox"/> | <input type="checkbox"/><br>hours | <input type="checkbox"/>                            | <input type="checkbox"/> | <input type="checkbox"/> | <input type="checkbox"/><br>hours |
| i) Reading books for pleasure                                                | <input type="checkbox"/> | <input type="checkbox"/> | <input type="checkbox"/> | <input type="checkbox"/><br>hours | <input type="checkbox"/> | <input type="checkbox"/> | <input type="checkbox"/> | <input type="checkbox"/><br>hours | <input type="checkbox"/>                            | <input type="checkbox"/> | <input type="checkbox"/> | <input type="checkbox"/><br>hours |
| j) Playing musical instruments                                               | <input type="checkbox"/> | <input type="checkbox"/> | <input type="checkbox"/> | <input type="checkbox"/><br>hours | <input type="checkbox"/> | <input type="checkbox"/> | <input type="checkbox"/> | <input type="checkbox"/><br>hours | <input type="checkbox"/>                            | <input type="checkbox"/> | <input type="checkbox"/> | <input type="checkbox"/><br>hours |
| k) Using a computer                                                          | <input type="checkbox"/> | <input type="checkbox"/> | <input type="checkbox"/> | <input type="checkbox"/><br>hours | <input type="checkbox"/> | <input type="checkbox"/> | <input type="checkbox"/> | <input type="checkbox"/><br>hours | <input type="checkbox"/>                            | <input type="checkbox"/> | <input type="checkbox"/> | <input type="checkbox"/><br>hours |
| l) Playing <b>hand-held</b> electronic devices ( <i>e.g.</i>                 | <input type="checkbox"/> | <input type="checkbox"/> | <input type="checkbox"/> | <input type="checkbox"/>          | <input type="checkbox"/> | <input type="checkbox"/> | <input type="checkbox"/> | <input type="checkbox"/>          | <input type="checkbox"/>                            | <input type="checkbox"/> | <input type="checkbox"/> | <input type="checkbox"/>          |

## Hong Kong Children Eye Study Questionnaire

|                                                |                          |                          |                          |                                            |                          |                          |                          |                                            |                          |                          |                          |                                            |
|------------------------------------------------|--------------------------|--------------------------|--------------------------|--------------------------------------------|--------------------------|--------------------------|--------------------------|--------------------------------------------|--------------------------|--------------------------|--------------------------|--------------------------------------------|
| <i>mobile phone,<br/>Gameboy, iPad/tablet)</i> |                          |                          |                          | _____<br>hours                             |                          |                          |                          | _____<br>hours                             |                          |                          |                          | _____<br>hours                             |
| m) Playing with and caring for pets            | <input type="checkbox"/> | <input type="checkbox"/> | <input type="checkbox"/> | <input type="checkbox"/><br>_____<br>hours | <input type="checkbox"/> | <input type="checkbox"/> | <input type="checkbox"/> | <input type="checkbox"/><br>_____<br>hours | <input type="checkbox"/> | <input type="checkbox"/> | <input type="checkbox"/> | <input type="checkbox"/><br>_____<br>hours |
| n) Going shopping                              | <input type="checkbox"/> | <input type="checkbox"/> | <input type="checkbox"/> | <input type="checkbox"/><br>_____<br>hours | <input type="checkbox"/> | <input type="checkbox"/> | <input type="checkbox"/> | <input type="checkbox"/><br>_____<br>hours | <input type="checkbox"/> | <input type="checkbox"/> | <input type="checkbox"/> | <input type="checkbox"/><br>_____<br>hours |
| o) Playing chess, cards or board games         | <input type="checkbox"/> | <input type="checkbox"/> | <input type="checkbox"/> | <input type="checkbox"/><br>_____<br>hours | <input type="checkbox"/> | <input type="checkbox"/> | <input type="checkbox"/> | <input type="checkbox"/><br>_____<br>hours | <input type="checkbox"/> | <input type="checkbox"/> | <input type="checkbox"/> | <input type="checkbox"/><br>_____<br>hours |

## Hong Kong Children Eye Study Questionnaire

1) What is the highest level of education completed by the **mother**?

- Never attended school
- Primary school
- High school
- Associate degree or higher diploma
- University, CAE or some other tertiary institute degree
- Higher degree including a Masters or PhD

Total amount of years spent in school: \_\_\_\_\_ years

2) What is the highest level of education completed by the **father**?

- Never attended school
- Primary school
- High school
- Associate degree or higher diploma
- University, CAE or some other tertiary institute degree
- Higher degree including a Masters or PhD

Total amount of years spent in school: \_\_\_\_\_ years

**Please tick the appropriate box and answer the following questions in Hong Kong dollars.**

3) What's your family income?

- < \$5,000
- \$5,000--10,000
- \$10,000 –11,999
- \$12,000 –14,999
- \$15,000 –19,999
- \$20,000 – 24,999
- \$25,000 –29,999
- \$30,000 – 34,999
- \$35,000 – 39,999
- \$40,000 – 49,999
- \$50,000 – 59,999
- \$60,000 – 79,999
- \$80,000 – 99,999
- \$100,000 –144,999
- \$150,000 –199,999
- ≥ \$200,000
