# Supplementary material for: Association of Maternal and Paternal Astigmatism With Child Astigmatism in the Hong Kong Children Eye Study
Source: PubMed Central journal article supplement (PMC9856878; doi:10.1001/jamanetworkopen.2022.47795), 2022-12-21
Supplement: jamanetwopen-e2247795-s002.pdf [file jamanetwopen-e2247795-s002.pdf]

## Data Sharing Statement

Kam. Association of Maternal and Paternal Astigmatism With Child Astigmatism in the Hong Kong Children Eye Study. *JAMA Netw Open*. Published December 21, 2022.  
doi:10.1001/jamanetworkopen.2022.47795

### Data

**Data available:** No
